# Supplementary material
Source: PubMed Central journal article supplement (PMC1559745)

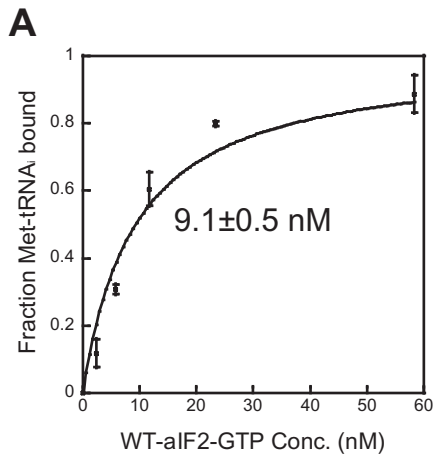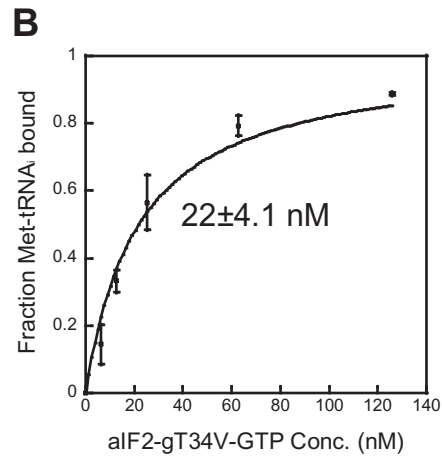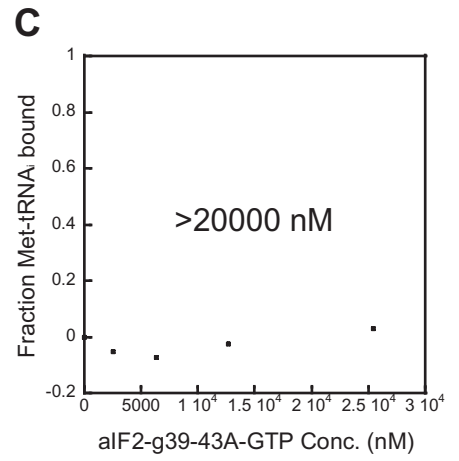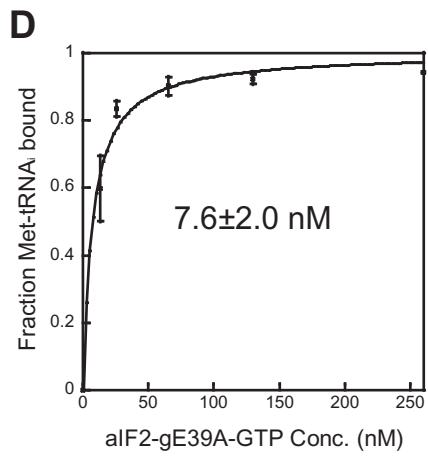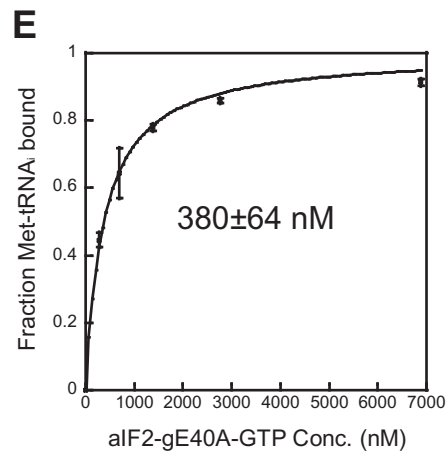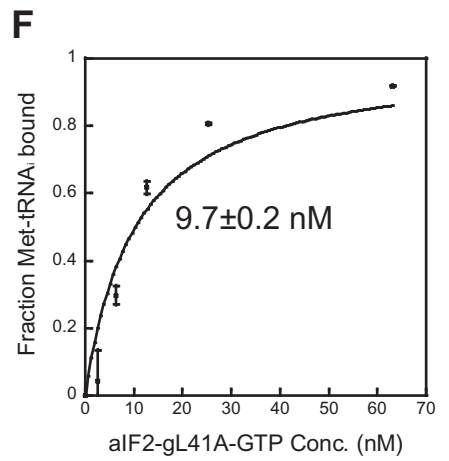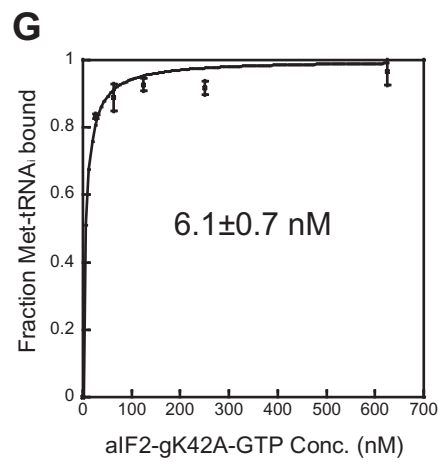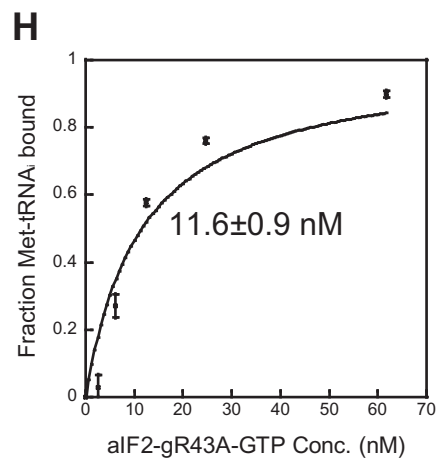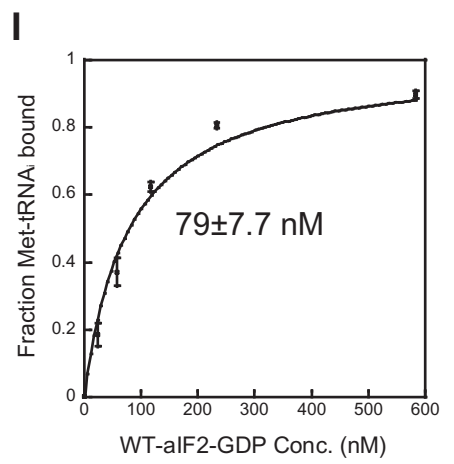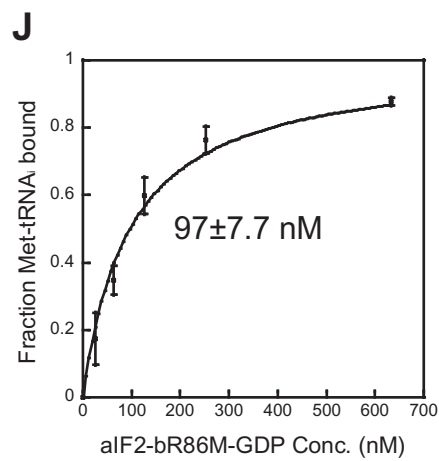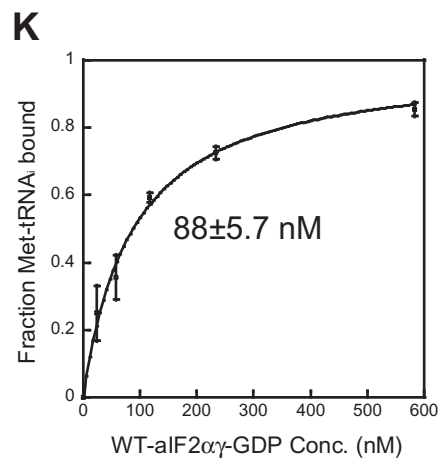

Supplement: pnas_0604165103_1.pdf [file pnas_0604165103_1.pdf]
